# Supplementary material for: A Guide to Carrying Out a Phylogenomic Target Sequence Capture Project
Source: Front Genet. 2020 Feb 21;10:1407. doi: 10.3389/fgene.2019.01407 (PMC7047930; doi:10.3389/fgene.2019.01407)
Supplement: Table S1 — Supplementary information for available bait sets. [file Table_1.xlsx]

## Sheet: Supplementary_Table1
Name of bait set	Clade	Common group name	Reference	Number of baits	Number of targeted loci
Arachnida 1.1Kv1	Arthropoda: Arachnida	Arachnids	Faircloth, 2017	14799	1120
Coleoptera 1.1Kv1	Arthropoda: Coleoptera	Beetles	Faircloth, 2017	13674	1172
Diptera 2.7Kv1	Arthropoda: Diptera	True flies and mosquitos	Faircloth, 2017	31328	2711
Hemiptera 2.7Kv1	Arthropoda: Hemiptera	True bugs	Faircloth, 2017	40207	2731
Hymenoptera 1.5Kv1 (hym‐v1)	Arthropoda: Hymenoptera	Sawflies, wasps, bees, ants	Faircloth et al., 2015	2749	1510
Hymenoptera 2.5Kv2 (hym‐v2)	Arthropoda: Hymenoptera	Wasps, bees, ants	Branstetter et al., 2017	31829	2590
BUTTERFLY1.0	Arthropoda: Lepidoptera (Papilionoidea)	Butterflies	Espeland et al., 2018	56470	425
BUTTERFLY2.0	Arthropoda: Lepidoptera (Papilionoidea: Hedylidae)	Butterflies, American moth-butterflies	Kawahara et al., 2018	14433	13*
Lepidoptera 1.3K-v1	Arthropoda: Lepidoptera	Butterflies	Faircloth, 2017	14363	1381
Actinopterygians 0.5Kv1	Chordata: Actinopterygii	Ray-finned fishes	Faircloth et al., 2013	2000	500
Acanthomorphs 1Kv1	Chordata: Acanthomorpha	Teleost fishes	Alfaro et al., 2018	2628	1314
-	Chordata: Amphibia	Amphibians	McCartney-Melstad, Mount & Shaffer, 2016	39984	8706
-	Chordata: Anura	Frogs	Portik, Smith & Bi, 2016	60179	1265
FrogCap	Chordata: Anura	Frogs	Hutter et al., 2019	40040	~15,000
AHE	Chordata	Chordates	Lemmon, Emme & Lemmon, 2012	56664	512
GENECODE	Chordata: Homo	Humans	Coffey et al., 2011	406539	205031
SqCL	Chordata: Squamata	Scaled reptiles	Singhal et al., 2017	38431	5312
Coding Regions	Chordata: Squamata	Scaled reptiles	Schott et al., 2017	45895	3,888**
Tetrapods-UCE-2.5Kv1 / Tetrapods-UCE-5Kv1	Chordata: Tetrapoda	Reptiles, birds and mammals	Faircloth et al., 2012	2560	2386
Anthozoa 1.7Kv1	Cnidaria: Anthozoa	Corals, sea anemones	Quattrini et al., 2018	16306	1791
Sphaerospira-Austrochlotitis-120-60-v2	Mollusca: Eupulmonata	Snails and slugs	Teasdale et al., 2016	20000	2648
Angiosperms-353	Plantae: Angiosperms	Flowering plants	Johnson et al., 2019	75151	353*
	Plantae: Arecaceae	Palms	de la Harpe et al., 2019	59264	4184
PhyloPalm	Plantae: Arecaceae (Geonomateae)	Palms	Loiseau et al., 2019	17091	795*
40916-Tapeworm	Platyhelminthes: Cyclophyllidea	Tapeworms	Yuan et al., 2016	39009	3641
PenSeq	Metagenomics: Plant parasitic Oomycetes	White rust	Jouet et al., 2018	18348	~48*
MetCap	Metagenomics: Bacteria in soil samples	Gene families	Kushwaha et al., 2015	300000	331 clusters of sequences related to carbohydrate-active enzimes
MEGaRICH	-	Antimicrobial and antiviral resistance genes	Noyes et al., 2017	27841	2490
ViroCap	Virus	Viruses	Wylie et al., 2015	2.1 million	Probes are design to identify viruses present in human samples.
*Genes

## Sheet: Table as in the paper
Name of bait set	Clade	Number of targeted loci	Reference
Arachnida 1.1Kv1	Arthropoda: Arachnida	1120	Faircloth, 2017
Coleoptera 1.1Kv1	Arthropoda: Coleoptera	1172	Faircloth, 2017
Diptera 2.7Kv1	Arthropoda: Diptera	2711	Faircloth, 2017
Hemiptera 2.7Kv1	Arthropoda: Hemiptera	2731	Faircloth, 2017
Hymenoptera 1.5Kv1 (hym‐v1)	Arthropoda: Hymenoptera	1510	Faircloth et al., 2015
Hymenoptera 2.5Kv2 (hym‐v2)	Arthropoda: Hymenoptera	2590	Branstetter et al., 2017
BUTTERFLY1.0	Arthropoda: Lepidoptera (Papilionoidea)	425	Espeland et al., 2018
BUTTERFLY2.0	Arthropoda: Lepidoptera (Papilionoidea: Hedylidae)	13*	Kawahara et al., 2018
Lepidoptera 1.3K-v1	Arthropoda: Lepidoptera	1381	Faircloth, 2017
Actinopterygians 0.5Kv1	Chordata: Actinopterygii	500	Faircloth et al., 2013
Acanthomorphs 1Kv1	Chordata: Acanthomorpha	1314	Alfaro et al., 2018
-	Chordata: Amphibia	8706	McCartney-Melstad, Mount & Shaffer, 2016
-	Chordata: Anura	1265	Portik, Smith & Bi, 2016
FrogCap	Chordata: Anura		Hutter et al., 2019
AHE	Chordata	512	Lemmon, Emme & Lemmon, 2012
GENECODE	Chordata: Homo	205031	Coffey et al., 2011
SqCL	Chordata: Squamata	5312	Singhal et al., 2017
Coding Regions	Chordata: Squamata	3,888**	Schott et al., 2017
Tetrapods-UCE-2.5Kv1 / Tetrapods-UCE-5Kv1	Chordata: Tetrapoda	2386	Faircloth et al., 2012
Anthozoa 1.7Kv1	Cnidaria: Anthozoa	1791	Quattrini et al., 2018
Sphaerospira-Austrochlotitis-120-60-v2	Mollusca: Eupulmonata	2648	Teasdale et al., 2016
Angiosperms-353	Plantae: Angiosperms	353*	Johnson et al., 2019
	Plantae: Arecaceae	4184	de la Harpe et al., 2019
PhyloPalm	Plantae: Arecaceae (Geonomateae)	795*	Loiseau et al., 2019
40916-Tapeworm	Platyhelminthes: Cyclophyllidea	3641	Yuan et al., 2016
PenSeq	Metagenomics: Plant parasitic Oomycetes	~48*	Thilliez et al., 2019
MetCap	Metagenomics: Bacteria in soil samples	331 clusters of sequences related to carbohydrate-active enzimes	Kushwaha et al., 2015
MEGaRICH	-	2490	Noyes et al., 2017
ViroCap	Virus	Probes are design to identify viruses present in human samples.	Wylie et al., 2015
*Genes
